# Supplementary material
Source: publisher figshare collection journal article supplement (https://gsajournals.figshare.com/articles/dataset/_/7182296)

**QTL underlying circadian clock parameters under seasonally variable field settings  
in *Arabidopsis thaliana***

**Supplemental Tables and Figures**

Matthew J. Rubin<sup>1,2,\*</sup>, Marcus T. Brock<sup>1</sup>, Seth J. Davis<sup>3</sup>, and Cynthia Weinig<sup>1,2,4</sup>

<sup>1</sup>Department of Botany, University of Wyoming, Laramie, WY 82071, USA.

<sup>2</sup>Program in Ecology, University of Wyoming, Laramie, WY 82071, USA.

<sup>3</sup>Department of Biology, University of York, Heslington, York, YO10 5DD, UK.

<sup>4</sup>Department of Molecular Biology, University of Wyoming, Laramie, WY 82071, USA.

\*Current address: Department of Biology, Syracuse University, Syracuse, NY 13244, USA

Author for correspondence:

Matthew Rubin

Tel: 315 443 8913

Email: [mjrub100@syr.edu](mailto:mjrub100@syr.edu)

**Supplementary Table 1.** Pearson correlations between phenotypic means for all pairs of traits for the *Arabidopsis thaliana* Ws-2 × C24 (top value), Ws-2 × *Ler* (middle value) and *Ler* × Ws-2 (bottom value) RIL sets. The phenotypic correlation is likely reduced as a result of summation over multiple positive and negative effect QTL. \*\*\*  $P < 0.001$ , \*\*  $P < 0.01$ , \*  $P < 0.05$ ; all significant correlation coefficients are shown in bold.

|                           | Cauline<br>Leaf<br>Number | Cauline<br>Branches | Rosette<br>Leaf<br>Number | Rosette<br>Branches | Rosette<br>Meristem<br>Fate |
|---------------------------|---------------------------|---------------------|---------------------------|---------------------|-----------------------------|
| June<br>Period            | <b>0.30***</b>            | <b>0.28*</b>        | <b>0.25*</b>              | <b>0.27*</b>        | 0.09                        |
|                           | -0.07                     | -0.01               | 0.03                      | 0.10                | 0.10                        |
|                           | -0.03                     | 0.07                | 0.01                      | 0.20                | 0.04                        |
| July<br>Period            | <b>0.31**</b>             | <b>0.31**</b>       | 0.20                      | 0.21                | 0.03                        |
|                           | 0.08                      | 0.01                | 0.04                      | 0.11                | 0.09                        |
|                           | <b>0.25*</b>              | <b>0.26*</b>        | 0.11                      | 0.20                | -0.27                       |
| June<br>Phase             | 0.21                      | 0.19                | 0.18                      | <b>0.35***</b>      | <b>0.24*</b>                |
|                           | 0.09                      | 0.07                | 0.07                      | 0.11                | -0.02                       |
|                           | 0.11                      | 0.05                | -0.11                     | -0.02               | 0.02                        |
| July<br>Phase             | <b>0.25*</b>              | <b>0.25*</b>        | 0.11                      | 0.19                | 0.13                        |
|                           | <b>0.25*</b>              | 0.20                | 0.16                      | 0.14                | -0.03                       |
|                           | -0.04                     | -0.03               | 0.05                      | -0.05               | -0.08                       |
| Cauline<br>Leaf<br>Number |                           | <b>0.99***</b>      | <b>0.79***</b>            | <b>0.78***</b>      | -0.01                       |
|                           |                           | <b>0.83***</b>      | 0.04                      | -0.03               | -0.16                       |
|                           |                           | <b>0.80***</b>      | <b>0.33**</b>             | -0.08               | <b>-0.35**</b>              |
| Cauline<br>Branches       |                           |                     | <b>0.80***</b>            | <b>0.78***</b>      | -0.03                       |
|                           |                           |                     | 0.08                      | 0.05                | -0.12                       |
|                           |                           |                     | <b>0.39***</b>            | -0.01               | <b>-0.37**</b>              |
| Rosette<br>Leaf<br>Number |                           |                     |                           | <b>0.84***</b>      | -0.18                       |
|                           |                           |                     |                           | <b>0.67***</b>      | <b>-0.42***</b>             |
|                           |                           |                     |                           | 0.20                | <b>-0.78***</b>             |
| Rosette<br>Branches       |                           |                     |                           |                     | <b>0.28*</b>                |
|                           |                           |                     |                           |                     | <b>0.29*</b>                |
|                           |                           |                     |                           |                     | <b>0.34**</b>               |

**Supplementary Table 2.** Pearson correlations between SNP posterior inclusion probabilities (PIPs) for all pairs of traits for the *Arabidopsis thaliana* Ws-2  $\times$  C24 (top value), Ws-2  $\times$  *Ler* (middle value) and *Ler*  $\times$  Ws-2 (bottom value) RIL sets. \*\*\*  $P < 0.001$ , \*\*  $P < 0.01$ , \*  $P < 0.05$ ; all significant correlation coefficients are shown in bold.

|                           | Cauline<br>Leaf<br>Number | Cauline<br>Branches | Rosette<br>Leaf<br>Number | Rosette<br>Branches | Rosette<br>Meristem<br>Fate |
|---------------------------|---------------------------|---------------------|---------------------------|---------------------|-----------------------------|
| June<br>Period            | -0.05                     | -0.04               | -0.06                     | -0.04               | -0.05                       |
|                           | 0.08                      | <b>0.33***</b>      | -0.05                     | -0.14               | 0.01                        |
|                           | -0.13                     | -0.08               | 0.05                      | 0.01                | 0.04                        |
| July<br>Period            | -0.04                     | -0.05               | 0.01                      | -0.09               | 0.01                        |
|                           | -0.09                     | -0.02               | -0.10                     | 0.16                | -0.15                       |
|                           | -0.03                     | 0.12                | <b>0.25**</b>             | <b>0.25**</b>       | <b>0.24**</b>               |
| June<br>Phase             | 0.04                      | 0.08                | -0.10                     | <b>0.25**</b>       | 0.04                        |
|                           | <b>0.19*</b>              | <b>0.61***</b>      | 0.02                      | -0.02               | -0.05                       |
|                           | <b>0.17*</b>              | 0.09                | 0.06                      | -0.09               | -0.04                       |
| July<br>Phase             | -0.01                     | -0.02               | -0.02                     | -0.03               | -0.02                       |
|                           | 0.12                      | -0.01               | 0.02                      | <b>0.28**</b>       | -0.05                       |
|                           | -0.04                     | 0.04                | 0.02                      | -0.12               | 0.11                        |
| Cauline<br>Leaf<br>Number |                           | <b>0.98***</b>      | <b>0.50***</b>            | <b>0.45***</b>      | 0.06                        |
|                           |                           | <b>0.57***</b>      | -0.05                     | -0.02               | -0.03                       |
|                           |                           | <b>0.53***</b>      | -0.01                     | -0.04               | -0.01                       |
| Cauline<br>Branches       |                           |                     | <b>0.51***</b>            | <b>0.45***</b>      | 0.03                        |
|                           |                           |                     | -0.09                     | -0.07               | -0.15                       |
|                           |                           |                     | 0.04                      | -0.02               | 0.09                        |
| Rosette<br>Leaf<br>Number |                           |                     |                           | <b>0.34***</b>      | <b>0.30***</b>              |
|                           |                           |                     |                           | <b>0.37***</b>      | <b>0.73***</b>              |
|                           |                           |                     |                           | 0.14                | <b>0.61***</b>              |
| Rosette<br>Branches       |                           |                     |                           |                     | 0.14                        |
|                           |                           |                     |                           |                     | <b>0.21*</b>                |
|                           |                           |                     |                           |                     | -0.04                       |

**Supplementary Figure 1.** Genetic architecture for all traits mapped in the *Arabidopsis thaliana* Ws-2  $\times$  C24 (left column), Ws-2  $\times$  Ler (middle column) and Ler  $\times$  Ws-2 (right column) RIL sets. For each trait we present the median number of SNPs (and associated confidence limits) with the highest PIP scores. SNPs move in and out of the model through the permutation procedure, therefore, this genetic architecture is only one of the possible outcomes.

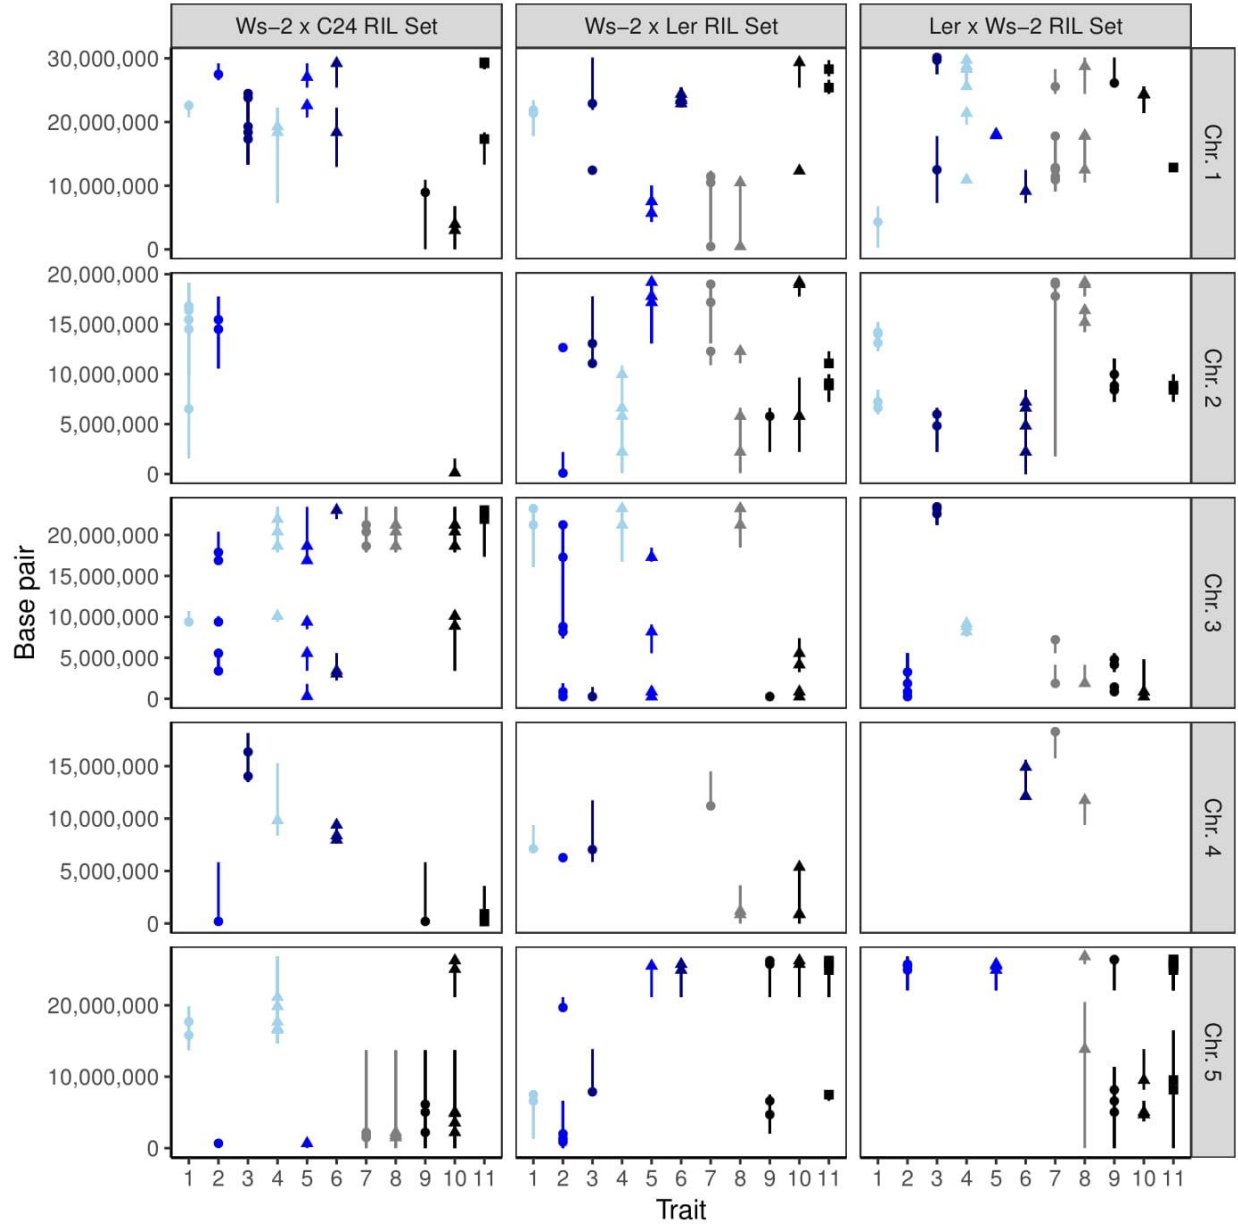

**Supplementary Figure 2.** Associations between SNP posterior inclusion probabilities (PIP) for circadian period and phase in (A) June (B) July and (C) September in the Ws-2  $\times$  *Ler* RIL set.

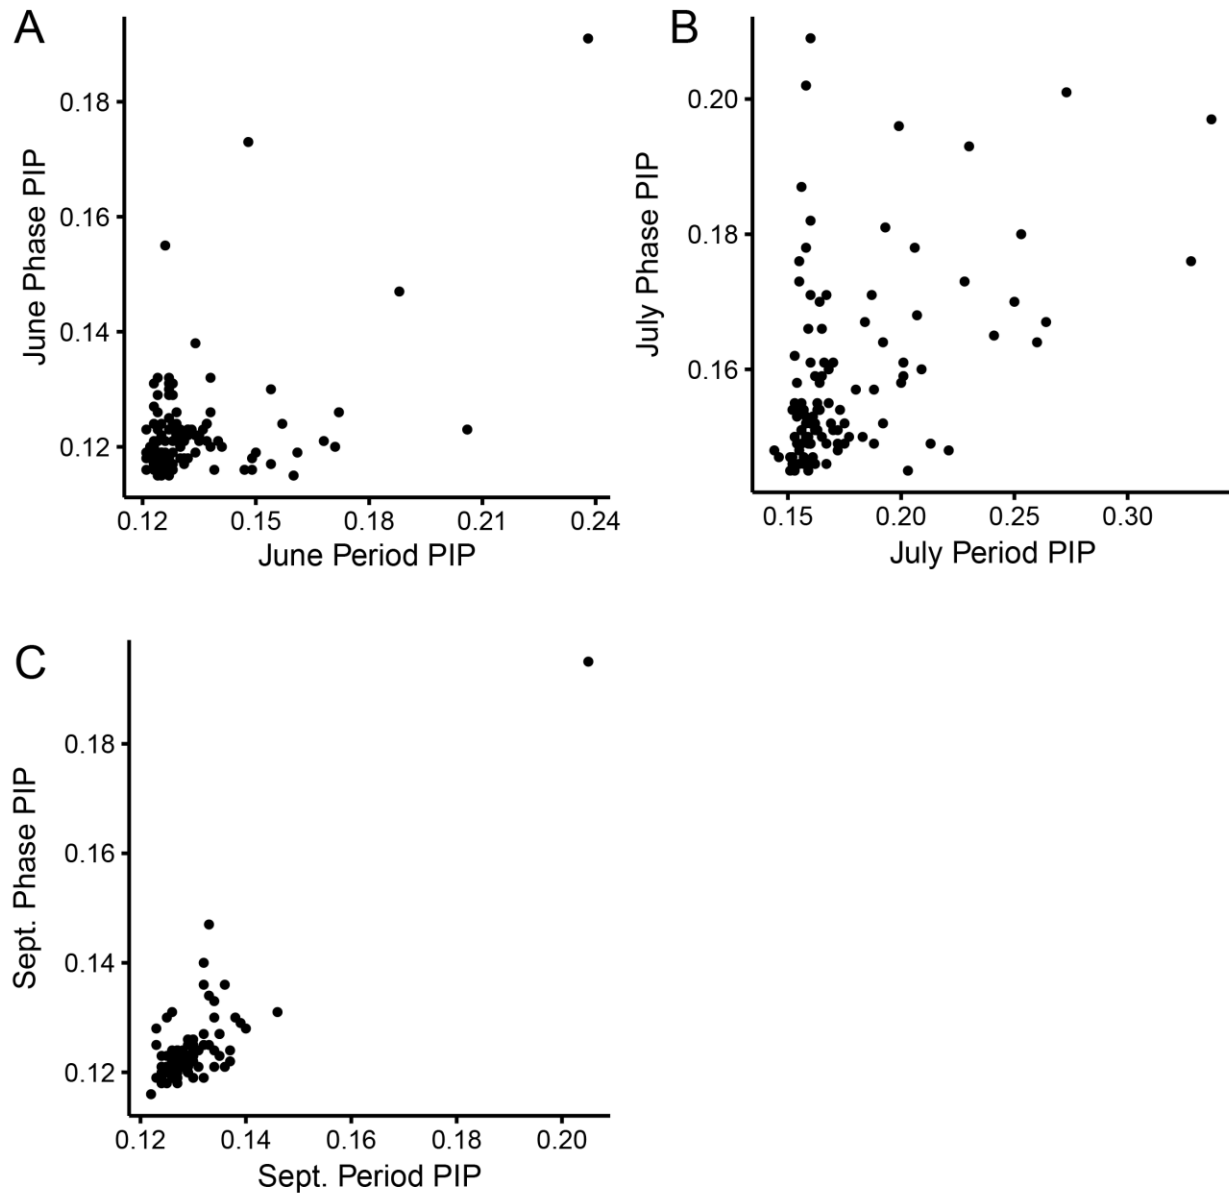

**Supplementary Figure 3** Associations between SNP posterior inclusion probabilities (PIP) for July circadian period and cauline branches (A) and rosette branches (B) for the *Arabidopsis thaliana* Ler  $\times$  Ws-2 RIL set.

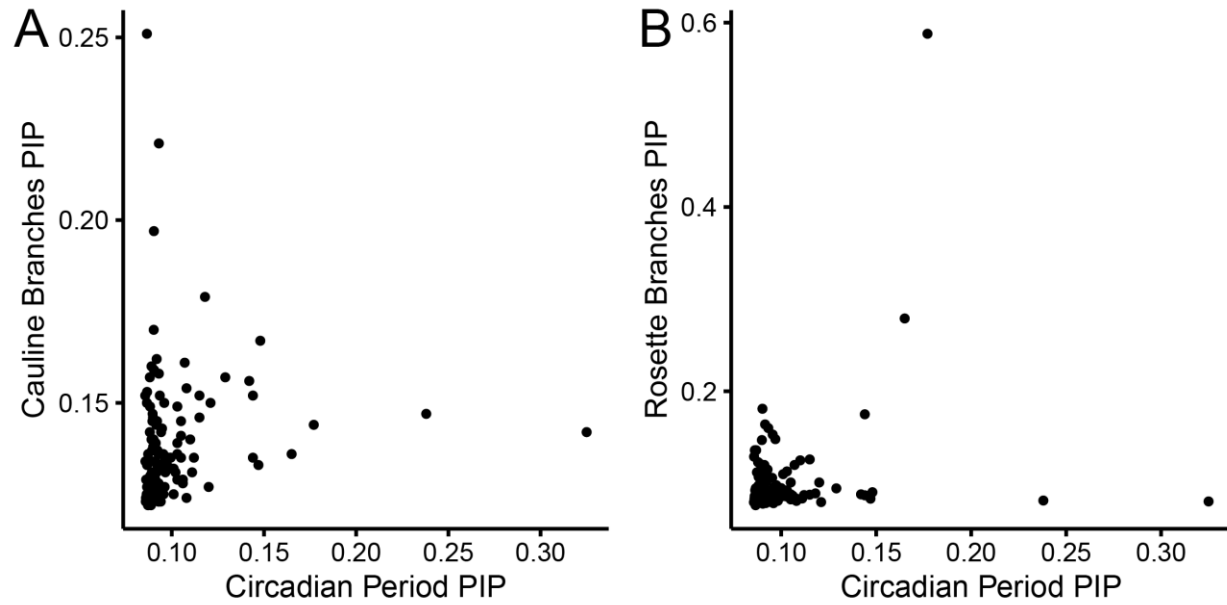

Supplement: Supplementary file 1 [file 1]
